# Supplementary material for: An Educational Intervention of Health Workers to Address the Social Determinants of Health: A Quasi Experimental Study in Khyber Pakhtunkhwa, Pakistan
Source: Research Square preprint supplement (doi:10.21203/rs.3.rs-6125666/v1), 2025-03-20
Supplement: Supplementary file 1 [file 2640c08be515feaab43a4f1e.docx]

# **LIST OF TABLES**

*Table 1: Predictors of Perceived Health and Social Status*

| 1. *Predictors of Perceived Health Status* | | | | |
| --- | --- | --- | --- | --- |
| **Variable** | **OR** | **Sig. Value** | **95% CI** | |
|  |  |  | **Lower** | **Upper** |
| **Gender** | -.098 | .156 | -.572 | .092 |
| **Age** | -.307 | .000 | -.034 | -.014 |
| **Marital Status** | **-.326** | **.000** | **-1.007** | **-.436** |
| **No. of Children** | -.149 | .031 | -.122 | -.006 |
| **Income Source** | .037 | .592 | -.046 | .080 |
| **Education** | .273 | .000 | .081 | .231 |
| **Employment** | .068 | .327 | -.032 | .095 |
| 1. *Predictors of Perceived Stress Status* | | | | |
| **Variable** | **OR** | **Sig. Value** | **95% CI** |  |
|  |  |  | **Lower** | **Upper** |
| **Gender** | -.036 | .603 | -.401 | .233 |
| **Age** | .070 | .317 | -.005 | .015 |
| **Marital Status** | .061 | .382 | -.159 | .414 |
| **No. of Children** | .002 | .975 | -.055 | .056 |
| **Income Source** | .020 | .772 | -.051 | .069 |
| **Education** | -.024 | .729 | -.088 | .062 |
| **Employment** | .040 | .562 | -.043 | .078 |
| 1. *Predictors of Cohen’s Perceived Stress Score* | | | | |
| **Variable** | **OR** | **Sig. Value** | **95% CI** |  |
|  |  |  | **Lower** | **Upper** |
| **Gender** | .176 | .011 | .328 | 2.504 |
| **Age** | .125 | .073 | -.003 | .066 |
| **Marital Status** | .093 | .180 | -.316 | 1.674 |
| **No. of Children** | .141 | .042 | .007 | .388 |
| **Income Source** | -.092 | .186 | -.348 | .068 |
| **Education** | -.128 | .065 | -.501 | .015 |
| **Employment** | -.078 | .261 | -.331 | .090 |
| 1. *Predictors of Food Security* | | | | |
| **Variable** | **OR** | **Sig. Value** | **95% CI** |  |
|  |  |  | **Lower** | **Upper** |
| **Gender** | -.020 | .769 | -.314 | .232 |
| **Age** | .114 | .100 | -.001 | .016 |
| **Marital Status** | -.030 | .664 | -.302 | .193 |
| **No. of Children** | .104 | .134 | -.011 | .084 |
| **Income Source** | .080 | .248 | -.021 | .082 |
| **Education** | -.029 | .673 | -.078 | .050 |
| **Employment** | .027 | .694 | -.042 | .062 |
| 1. *Predictors of Security* | | | | |
| **Variable** | **OR** | **Sig. Value** | **95% CI** |  |
|  |  |  | **Lower** | **Upper** |
| **Gender** | .064 | .359 | -.171 | .469 |
| **Age** | -.158 | .022 | -.022 | -.002 |
| **Marital Status** | .002 | .972 | -.285 | .296 |
| **No. of Children** | -.065 | .347 | -.082 | .029 |
| **Income Source** | .000 | 1.000 | -.061 | .061 |
| **Education** | -.167 | .015 | -.166 | -.018 |
| **Employment** | -.147 | .033 | -.126 | -.005 |
| 1. *Predictors of Resilience* | | | | |
| **Variable** | **OR** | **Sig. Value** | **95% CI** |  |
|  |  |  | **Lower** | **Upper** |
| **Gender** | -.067 | .336 | -5.927 | 2.036 |
| **Age** | .147 | .036 | .009 | .258 |
| **Marital Status** | -.065 | .352 | -5.299 | 1.897 |
| **No. of Children** | .104 | .139 | -.171 | 1.219 |
| **Income Source** | -.086 | .219 | -1.219 | .281 |
| **Education** | .040 | .564 | -.667 | 1.219 |
| **Employment** | -.007 | .924 | -.791 | .718 |
| 1. *Predictors of Social Support* | | | | |
| **Variable** | **OR** | **Sig. Value** | **95% CI** |  |
|  |  |  | **Lower** | **Upper** |
| **Variable** | -.048 | .491 | -1.163 | .560 |
|  | .020 | .776 | -.023 | .031 |
| **Gender** | -.106 | .128 | -1.381 | .175 |
| **Age** | -.030 | .663 | -.185 | .118 |
| **Marital Status** | .057 | .409 | -.095 | .231 |
| **No. of Children** | .200 | .004 | .097 | .495 |
| **Income Source** | .092 | .186 | -.053 | .273 |

Table 2: Pre and post Stress, Resilience and Social Support mean Score- Item wise

| **STRESS LEVELS** | | | | | |
| --- | --- | --- | --- | --- | --- |
| VARIABLES | | | | Mean±SD | |
| PRE-INTERVENTION | POST-INTERVENTION |
| 1 | How often have you been upset because of something that happened unexpectedly? | | | 2.06±1.093 | 1.94±1.166 |
| 2 | How often have you felt that you were unable to control the important things in your life? | | | 1.80±1.161 | 1.71±0.897 |
| 3 | How often have you felt nervous and “stressed”? | | | 2.32±0.764 | 1.98±1.229 |
| 4 | How often have you felt confident about your ability to handle your personal problems? | | | 2.35±1.309 | 2.69±0.965 |
| 5 | How often have you felt that things were going your way? | | | 2.09±2.239 | 2.10±1.067 |
| 6 | How often have you found that you could not cope with all the things that you had to do? | | | 1.98±0.938 | 1.89±1.116 |
| 7 | How often have you been able to control irritations in your life? | | | 2.41±0.952 | 2.07±1.192 |
| 8 | How often have you felt that you were on top of things? | | | 1.68±1.249 | 2.30±0.989 |
| 9 | How often have you been angered because of things that were outside of your control? | | | 2.47±0.951 | 2.13±1.191 |
| 10 | How often have you felt difficulties were piling up so high that you could not overcome them? | | | 2.06±0.893 | 1.97±1.149 |
| **RESILIENCE TO STRESS** | | | | | |
| VARIABLES | | | | Mean±SD | |
| PRE-INTERVENTION | POST-INTERVENTION |
| 1 | | | I eat at least one balanced meal a day. | 2.20±1.265 | 2.43±1.268 |
| 2 | | | I get 7-8 hours of sleep at least four nights a week | 2.33±1.415 | 2.59±0.980 |
| 3 | | | I give and receive affection regularly | 2.47±1.285 | 2.52±1.006 |
| 4 | | | I have at least one relative within 50 miles, on whom I can rely. | 2.09±1.425 | 2.42±1.034 |
| 5 | | | I exercise to the point of perspiration at least twice a week. | 1.69±3.129 | 2.00±1.181 |
| 6 | | | I limit myself to less than half a pack of cigarettes a day | 0.63±1.207 | 1.57±1.540 |
| 7 | | | I take fewer than five cups of tea a week. | 1.97±1.397 | 2.07±1.187 |
| 8 | | | I am the appropriate weight for my height. | 2.51±1.352 | 2.55±1.283 |
| 9 | | | I have money adequate to meet basic expenses. | 2.14±1.259 | 2.39±1.229 |
| 10 | | | I get strength from my religious beliefs. | 3.29±1.223 | 2.95±1.156 |
| 11 | | | I regularly attend social activities. | 2.08±1.427 | 2.25±1.124 |
| 12 | | | I have a network of friends and acquaintances. | 2.14±1.411 | 2.31±1.027 |
| 13 | | | I have one or more friends to confide in about personal matters. | 1.92±1.318 | 2.61±1.111 |
| 14 | | | I am in good health (including eye-sight, hearing, teeth). | 2.62±1.342 | 2.82±1.115 |
| 15 | | | I am able to speak openly about my feelings when angry or worried. | 2.03±1.194 | 2.46±1.129 |
| 16 | | | I have regular conversations with the people I live with about domestic problems | 1.97±1.347 | 2.07±1.000 |
| 17 | | | I do something for fun at least once a week. | 1.75±1.288 | 2.03±0.948 |
| 18 | | | I am able to organize my time effectively. | 1.99±1.179 | 2.30±1.065 |
| 19 | | | I drink fewer than three cups of coffee a day. | 1.35±1.392 | 1.86±1.367 |
| 20 | | | I take some quite time for myself during the day. | 2.03±1.278 | 2.36±0.979 |
| **SOCIAL SUPPORT** | | | | | |
|  | | | | | |
| VARIABLES | | | | Mean±SD | |
| PRE-INTERVENTION | POST-INTERVENTION |
| 1 | | In the last month, have you ever felt helpless in dealing with problems in your life? | | 3.50±0.974 | 3.40±1.054 |
| 2 | | In the last month, have you ever talked to a health professional about your social challenges? | | 2.73±1.306 | 3.05±1.303 |
| 3 | | In the last month, how strongly do you feel you belong to your immediate  community/neighborhood? | | 3.79±0.989 | 3.85±0.781 |
| 4 | | In the last month, have you felt that you have people in your life that you can depend on who would be able to help you if you really needed it? | | 3.90±0.797 | 3.91±0.967 |
| 5 | | In the last month, were you able to face difficult situations in a positive way? | | 3.45±1.245 | 3.86±0.993 |
| 6 | | Using a scale of 0 to 4, where 0 means "Very dissatisfied" and 4 means "Very satisfied", how do you feel about your life as a whole right now? | | 2.34±0.670 | 2.59±0.989 |
| 7 | | In the last month, have you felt that you have the power to make important decisions that change the course of your life? | | 2.74±1.102 | 3.13±1.062 |

Table 3: Normality Check of Social and Health Outcome Variables

| **Social Outcome Variables** | | | |
| --- | --- | --- | --- |
|  | Kolmogorov-Smirnova | | |
| Statistic | df | Sig. |
| Pre-Safety | .332 | 178 | .000 |
| Post-Safety | .278 | 178 | .000 |
| Pre-Food Security | .363 | 178 | .000 |
| Post-Food Security | .361 | 178 | .000 |
| Pre-Resilience | .113 | 178 | .000 |
| Post-Resilience | .088 | 178 | .002 |
| Pre-Social Support | .082 | 178 | .005 |
| Post-Social Support | .096 | 178 | .000 |
| **Health Outcome Variables** | | | |
|  | Kolmogorov-Smirnova | | |
| Statistic | df | Sig. |
| Pre-Current Perceived Health Status | .174 | 196 | .000 |
| Post-Current Perceived Health Status | .249 | 196 | .000 |
| Pre-Perceived Stress | .192 | 196 | .000 |
| Post- Perceived Stress | .248 | 196 | .000 |
| Pre-Stress Score | .070 | 196 | .019 |
| Post-Stress Score | .091 | 196 | .000 |

Table 4: Pre and Post Comparison of Health and Social Outcomes

| **Health Outcomes** | | | |
| --- | --- | --- | --- |
|  |  | Mean Rank | Sig. Value |
| Pair 1 | Pre-Current Perceived Health Status | 78.27 |  |
|  | Post- Current Perceived Health Status | 91.88 | 0.001 |
| Pair 2 | Pre-Perceived Stress | 80.79 |  |
|  | Post- Perceived Stress | 78.88 | 0.000 |
| Pair 3 | Pre-Stress Score | 97.08 |  |
|  | Post-Stress Score | 87.43 | 0.000 |
| **Social Outcome** | | | |
|  |  | Mean Rank | Sig. Value |
| Pair 1 | Pre-Safety | 62.18 | 0.000 |
|  | Post-Safety | 77.26 |  |
| Pair 2 | Pre-Food Security | 58.00 | 0.266 |
|  | Post-Food Security | 50.43 |  |
| Pair 3 | Pre-Resilience | 73.92 | 0.000 |
|  | Post-Resilience | 92.36 |  |
| Pair 4 | Pre-Social Support | 84.78 | 0.014 |
|  | Post-Social Support | 93.76 |  |
